# Supplementary material
Source: PubMed Central journal article supplement (PMC9474658)

**Metabolomic Profiling of the Effects of Dapagliflozin in Heart Failure with Reduced Ejection  
Fraction: DEFINE-HF  
Supplementary Material  
S. Selvaraj et al.**

**Supplementary Table 1. List of metabolite symbols and names**

| Metabolite Symbol | Trivial name(s)                                                              |
|-------------------|------------------------------------------------------------------------------|
| C2                | Acetyl carnitine                                                             |
| C3                | Propionyl carnitine                                                          |
| Ci4-DC/C4-DC      | Methylmalonyl carnitine or Succinyl carnitine                                |
| C4/Ci4            | Butyryl carnitine or Isobutyryl carnitine                                    |
| C4-OH             | 3-Hydroxy-butyryl carnitine, b-hydroxy butyryl carnitine                     |
| C5:1              | Tiglyl carnitine                                                             |
| C5's              | Isovaleryl carnitine, 3-methylbutyryl carnitine or 2-Methylbutyryl carnitine |
| C5-DC             | Glutaryl carnitine                                                           |
| C5-OH/C3-DC       | 3-Hydroxy-isovaleryl carnitine or Malonyl carnitine                          |
| C6                | Hexanoyl carnitine                                                           |
| C6-DC             | Adipoyl carnitine                                                            |
| C7-DC             | Pimeloyl carnitine, heptanedioyl carnitine                                   |
| C8                | Octanoyl carnitine                                                           |
| C8:1              | Octenoyl carnitine                                                           |
| C8:1-DC           | Octenedioyl carnitine                                                        |
| C8:1-OH/C6:1-DC   | 3-Hydroxy- <i>cis</i> -5-octenoyl carnitine or Hexenedioyl carnitine         |
| C10:3             | Decatrienoyl carnitine                                                       |
| C10:2             | Decadienoyl carnitine                                                        |
| C10:1             | Decenoyl carnitine                                                           |
| C10               | Decanoyl carnitine                                                           |
| C10-OH/C8-DC      | 3-Hydroxy-decanoyl carnitine or Suberoyl carnitine                           |
| C12:1             | Dodecenoyl carnitine                                                         |
| C12               | Lauroyl carnitine                                                            |
| C12-OH/C10-DC     | 3-Hydroxy-dodecanoyl carnitine or Sebacyl carnitine                          |
| C14:2             | Tetradecadienoyl carnitine                                                   |
| C14:1             | Tetradecenoyl carnitine                                                      |
| C14               | Myristoyl carnitine                                                          |
| C14:1-OH          | 3-Hydroxy-tetradecenoyl carnitine                                            |
| C14-OH/C12-DC     | 3-Hydroxy-tetradecanoyl carnitine or Dodecanedioyl carnitine                 |
| C16               | Palmitoyl carnitine                                                          |
| C16-OH/C14-DC     | 3-Hydroxy-hexadecanoyl carnitine or Tetradecanedioyl carnitine               |

| Metabolite Symbol | Trivial name(s)                                                                   |
|-------------------|-----------------------------------------------------------------------------------|
| C16:2             | Hexadecadienoyl carnitine                                                         |
| C16:1             | Palmitoleoyl carnitine                                                            |
| C16:1-OH/C14:1-DC | 3-Hydroxy-palmitoleoyl carnitine or <i>cis</i> -5-Tetradecenedioyl carnitine      |
| C18:2-OH          | 3-Hydroxy-linoleyl carnitine                                                      |
| C18:2             | Linoleyl carnitine                                                                |
| C18:1             | Oleoyl carnitine                                                                  |
| C18               | Stearoyl carnitine                                                                |
| C18:1-OH          | 3-Hydroxy-octadecenoyl carnitine                                                  |
| C18-OH/C16-DC     | 3-Hydroxy-octadecanoyl carnitine or Hexadecanedioyl carnitine, thapsoyl carnitine |
| C18:1-DC          | Octadecenedioyl carnitine                                                         |
| C20               | Arachidoyl carnitine, eicosanoyl carnitine                                        |
| C20-OH/C18-DC     | 3-Hydroxy-eicosanoyl carnitine or Octadecanedioyl carnitine                       |
| C22               | Behenoyl carnitine, docosanoyl carnitine                                          |
| C20:4             | Arachidonoyl carnitine                                                            |
| Ala               | Alanine                                                                           |
| Arg               | Arginine                                                                          |
| Asx               | Asparagine + Aspartate                                                            |
| Cit               | Citrulline                                                                        |
| Glx               | Glutamine + Glutamate                                                             |
| Gly               | Glycine                                                                           |
| His               | Histidine                                                                         |
| Leu/Ile           | Leucine + Isoleucine                                                              |
| Met               | Methionine                                                                        |
| Orn               | Ornithine                                                                         |
| Phe               | Phenylalanine                                                                     |
| Pro               | Proline                                                                           |
| Ser               | Serine                                                                            |
| Tyr               | Tyrosine                                                                          |
| Val               | Valine                                                                            |
| NEFA              | Nonesterified fatty acids                                                         |
| KET               | Ketones                                                                           |
| BHB               | $\beta$ -hydroxybutyrate                                                          |

**Supplementary Table 2. Percentages of sample undetectability by metabolite.**

| <b>Metabolite</b> | <b>Percent of samples undetectable</b> |
|-------------------|----------------------------------------|
| C7-DC             | 5.1                                    |
| C22               | 4.9                                    |
| C20               | 4.5                                    |
| C5-DC             | 2.6                                    |
| C18:1-OH/C16:1-DC | 1.7                                    |
| C12-OH/C10-DC     | 1.5                                    |
| C16-OH/C14-DC     | 1.3                                    |
| C18:2-OH          | 1.3                                    |
| C4-OH             | 0.6                                    |
| C6                | 0.6                                    |
| C20:4             | 0.6                                    |
| C18-OH/C16-DC     | 0.4                                    |
| C4-DC/Ci4-DC      | 0.2                                    |
| C12               | 0.2                                    |
| C14-OH/C12-DC     | 0.2                                    |

**Supplementary Table 3. Metabolites in each factor ranked by factor loads.**

| Factor1 | Factor2  | Factor3           | Factor4           | Factor5       | Factor6                   | Factor7         | Factor8         | Factor9      | Factor10          | Factor11                  | Factor12        | Factor13        |
|---------|----------|-------------------|-------------------|---------------|---------------------------|-----------------|-----------------|--------------|-------------------|---------------------------|-----------------|-----------------|
| C10     | Phe      | C18:1             | C18-OH/C16-DC     | Ser           | 3-Hydroxybutyrate         | C8:1            | Arg             | C20:4        | Ala               | C3                        | Glx             | C4-DC/Ci4-DC    |
| C8      | Met      | C18               | C18:1-DC          | Gly           | Total ketones             | C10:3           | Cit             | C22          | Pro               | C5                        | Orn             | C6-DC/C8-OH     |
| C12     | Tyr      | C16               | C18:1-OH/C16:1-DC | Asx           | C4-OH                     | C10:2           | Gly             | C20          | His               | C4/Ci4                    | Tyr             | C5-DC           |
| C16:2   | Leu/Ile  | C18:2             | C20-OH/C18-DC     | C5:1          | Nonesterified fatty acids | C10:1           | Orn             | C18:2        | C14-OH/C12-DC     | C5:1                      | Cit             | C5-OH/C3-DC     |
| C14:1   | Val      | C20               | C16-OH/C14-DC     | Met           | C2                        | C8:1-DC         | His             | C14:1-OH     | Leu/Ile           | Val                       | Pro             | C8:1-OH/C6:1-DC |
| C14:2   | His      | C16:1             | C14-OH/C12-DC     | C14:1-OH      | C10-OH/C8-DC              | C12:1           | C16-OH/C14-DC   | C2           | Val               | Leu/Ile                   | Gly             | C7-DC           |
| C14     | C5       | C14               | C18:2-OH          | C12-OH/C10-DC | C6-DC/C8-OH               | C8:1-OH/C6:1-DC | C22             | Asx          | C16-OH/C14-DC     | C5-OH/C3-DC               | His             | C10-OH/C8-DC    |
| C6      | Orn      | C20:4             | C16:1-OH/C14:1-DC | C10-OH/C8-DC  | C12-OH/C10-DC             | C2              | Asx             | C10:1        | C18:1-DC          | C2                        | C3              | C4/Ci4          |
| C10:1   | Ser      | C6                | C14:1-OH          | C6-DC/C8-OH   | C14-OH/C12-DC             | C6-DC/C8-OH     | C8:1-OH/C6:1-DC | C6           | Met               | Nonesterified fatty acids | C4-DC/Ci4-DC    | C8:1-DC         |
| C16:1   | C22      | C16:1-OH/C14:1-DC | C12-OH/C10-DC     | Orn           | C14:1                     | C4-DC/Ci4-DC    | Ser             | C10-OH/C8-DC | Asx               | C4-DC/Ci4-DC              | C5:1            | C12-OH/C10-DC   |
| C12:1   | Ala      | C16:2             | C10-OH/C8-DC      | C12:1         | C18:1-OH/C16:1-DC         | C14:2           | Pro             | C12:1        | Glx               | Ser                       | C6-DC/C8-OH     | Val             |
| C5-DC   | Arg      | C14:1             | C12:1             | Glx           | C14:2                     | C10-OH/C8-DC    | C5:1            | Pro          | C20:4             | Orn                       | C14-OH/C12-DC   | Cit             |
| C7-DC   | C18:1-DC | C14:1-OH          | C8:1-DC           | C16           | C18:1                     | C18:2           | C14-OH/C12-DC   | C8:1-DC      | C18:1-OH/C16:1-DC | C5-DC                     | C8:1-OH/C6:1-DC | C2              |

|                           |               |                   |                 |                           |                   |               |               |                           |                   |                 |               |               |
|---------------------------|---------------|-------------------|-----------------|---------------------------|-------------------|---------------|---------------|---------------------------|-------------------|-----------------|---------------|---------------|
| C12-OH/C10-DC             | C3            | C18:2-OH          | C7-DC           | C18:2                     | C14:1-OH          | C14:1-OH      | C18-OH/C16-DC | C10:2                     | Gly               | C4-OH           | C18:1-DC      | C18:2-OH      |
| C10-OH/C8-DC              | C5-OH/C3-DC   | C18:1-OH/C16:1-DC | C14:1           | C10:2                     | Ala               | C7-DC         | Met           | C12-OH/C10-DC             | C4-OH             | Tyr             | C18:2         | C14:1-OH      |
| C8:1-DC                   | C16-OH/C14-DC | C2                | C14:2           | His                       | C18:2-OH          | C12-OH/C10-DC | C4-OH         | C10:3                     | C6-DC/C8-OH       | Phe             | C20:4         | Leu/Ile       |
| C14:1-OH                  | Asx           | C14:2             | C4-OH           | C20:4                     | Leu/Ile           | C4-OH         | C4-DC/Ci4-DC  | Val                       | 3-Hydroxybutyrate | C18-OH/C16-DC   | C20           | C12           |
| C16                       | C4-OH         | C22               | C6-DC/C8-OH     | C18:1-OH/C16:1-DC         | C16:2             | C18:1-DC      | C16           | His                       | Total ketones     | C8:1            | C10-OH/C8-DC  | C10:3         |
| C16:1-OH/C14:1-DC         | C6-DC/C8-OH   | Arg               | C2              | Nonesterified fatty acids | C16:1-OH/C14:1-DC | C14:1         | Leu/Ile       | C18:1-DC                  | C20-OH/C18-DC     | C20:4           | C4/Ci4        | C4-OH         |
| C18:1                     | C12:1         | C12:1             | C10:1           | C4-DC/Ci4-DC              | C12:1             | C18:2-OH      | C20-OH/C18-DC | C14-OH/C12-DC             | Arg               | Glx             | C5            | C20-OH/C18-DC |
| C8:1-OH/C6:1-DC           | Pro           | Orn               | C16             | C16:1-OH/C14:1-DC         | C16               | C16:2         | C6            | C5:1                      | C20               | C8:1-OH/C6:1-DC | C18-OH/C16-DC | Ser           |
| C10:2                     | C20-OH/C18-DC | C5-OH/C3-DC       | C18             | C14-OH/C12-DC             | Ser               | Ser           | C14           | C18:1                     | C18:1             | C16:1           | C8:1          | C12:1         |
| C14-OH/C12-DC             | C18:2-OH      | Gly               | C8:1-OH/C6:1-DC | Pro                       | C16:1             | C3            | C8:1          | C14                       | C2                | C6              | C4-OH         | C10:2         |
| C2                        | C2            | C10:3             | Cit             | C18                       | C3                | C6            | C20:4         | C16:1                     | C14               | C8:1-DC         | C20-OH/C18-DC | C18:1-DC      |
| Nonesterified fatty acids | Cit           | C12               | C18:1           | C5-OH/C3-DC               | C4-DC/Ci4-DC      | C20-OH/C18-DC | Ala           | C14:2                     | C14:2             | Met             | C22           | C14           |
| C18:1-DC                  | C4-DC/Ci4-DC  | 3-Hydroxybutyrate | C14             | C22                       | Tyr               | C5-OH/C3-DC   | Val           | C6-DC/C8-OH               | C16               | C22             | Val           | C14:1         |
| C18:2                     | C5-DC         | Total ketones     | Ser             | C8:1-DC                   | Val               | Cit           | C16:1         | Nonesterified fatty acids | C14:1             | Gly             | Leu/Ile       | Phe           |

|                   |               |                           |                           |               |               |                           |                   |                   |                           |               |                   |                           |
|-------------------|---------------|---------------------------|---------------------------|---------------|---------------|---------------------------|-------------------|-------------------|---------------------------|---------------|-------------------|---------------------------|
| C18:1-OH/C16:1-DC | C12-OH/C10-DC | C18-OH/C16-DC             | C4-DC/Ci4-DC              | C12           | Asx           | Arg                       | C10:1             | C4-OH             | C18:2                     | C18           | C12-OH/C10-DC     | C5                        |
| C18               | C4/Ci4        | C18:1-DC                  | C12                       | C14           | C18:1-DC      | Phe                       | C3                | C20-OH/C18-DC     | C5-OH/C3-DC               | C16-OH/C14-DC | C5-DC             | Pro                       |
| C4-DC/Ci4-DC      | C8:1          | C3                        | Total ketones             | C16-OH/C14-DC | C14           | C22                       | C7-DC             | Met               | C18                       | Cit           | C5-OH/C3-DC       | Orn                       |
| C6-DC/C8-OH       | C7-DC         | Nonesterified fatty acids | 3-Hydroxybutyrate         | C18-OH/C16-DC | Pro           | C14-OH/C12-DC             | C5                | Leu/Ile           | C12-OH/C10-DC             | C16           | C18:1-OH/C16:1-DC | C3                        |
| C20-OH/C18-DC     | C8:1-DC       | C10:1                     | Ala                       | Leu/Ile       | C18:2         | Orn                       | C10:3             | C16:1-OH/C14:1-DC | C16:1-OH/C14:1-DC         | Ala           | C12               | C16-OH/C14-DC             |
| C20               | C20           | C4-OH                     | C16:2                     | C14:1         | C12           | C18:1                     | C18:2-OH          | Gly               | C10:3                     | C8            | Ala               | C18-OH/C16-DC             |
| C4-OH             | C5:1          | C8:1                      | C16:1                     | C5-DC         | C8:1          | C16:1                     | C12-OH/C10-DC     | Cit               | Nonesterified fatty acids | C18:1-DC      | C14               | C14-OH/C12-DC             |
| C18:2-OH          | C18-OH/C16-DC | Val                       | C10:2                     | C6            | C22           | C16:1-OH/C14:1-DC         | C4/Ci4            | C14:1             | C18:2-OH                  | C14:2         | C18:1             | C16:1-OH/C14:1-DC         |
| His               | C10-OH/C8-DC  | Leu/Ile                   | Met                       | C18:1-DC      | C5-DC         | His                       | C6-DC/C8-OH       | C8                | C10:1                     | C14-OH/C12-DC | Arg               | C22                       |
| 3-Hydroxybutyrate | C14:1-OH      | C10-OH/C8-DC              | C3                        | C16:2         | C5:1          | Met                       | C16:1-OH/C14:1-DC | C16:2             | C22                       | C14:1         | C12:1             | C5:1                      |
| C5                | C8            | C8:1-OH/C6:1-DC           | C20:4                     | C20-OH/C18-DC | Glx           | Gly                       | Glx               | C4-DC/Ci4-DC      | C12:1                     | C18:2-OH      | C14:1             | Nonesterified fatty acids |
| Total ketones     | Glx           | C14-OH/C12-DC             | Nonesterified fatty acids | Phe           | C16-OH/C14-DC | C16                       | C16:2             | C10               | C8:1-DC                   | C10-OH/C8-DC  | Phe               | Arg                       |
| C18-OH/C16-DC     | C10:2         | Ala                       | C5:1                      | Arg           | C6            | C12                       | C14:2             | Tyr               | Cit                       | C12-OH/C10-DC | C2                | C16:1                     |
| C8:1              | Gly           | C4-DC/Ci4-DC              | Arg                       | C8            | C7-DC         | Nonesterified fatty acids | C8:1-DC           | C5-DC             | C18-OH/C16-DC             | C20-OH/C18-DC | C10:1             | C18:1                     |

|               |                   |               |             |                   |                 |                   |                           |               |                 |                   |                   |                   |
|---------------|-------------------|---------------|-------------|-------------------|-----------------|-------------------|---------------------------|---------------|-----------------|-------------------|-------------------|-------------------|
| C22           | C10               | C20-OH/C18-DC | C4/Ci4      | C4/Ci4            | C18-OH/C16-DC   | C20               | C10:2                     | C4/Ci4        | C12             | C18:1-OH/C16:1-DC | C7-DC             | C8:1              |
| Ser           | C14               | Phe           | C10:3       | C14:2             | C8:1-OH/C6:1-DC | Pro               | C14:1                     | C3            | Ser             | C16:2             | C8:1-DC           | C20:4             |
| Val           | C18:1-OH/C16:1-DC | Cit           | Val         | C4-OH             | C8:1-DC         | Tyr               | C18:1-OH/C16:1-DC         | Arg           | C4/Ci4          | C10:2             | C10:2             | C16               |
| Asx           | C10:3             | Glx           | C8:1        | Ala               | C10:1           | C5                | C5-DC                     | C8:1          | C5-DC           | C12:1             | C14:2             | C6                |
| C10:3         | C6                | C4/Ci4        | C5-DC       | C2                | Arg             | 3-Hydroxybutyrate | C2                        | C5-OH/C3-DC   | C8:1            | Asx               | C6                | C10               |
| Orn           | C16               | C12-OH/C10-DC | C10         | C10:1             | Met             | C16-OH/C14-DC     | C10                       | Ala           | C5:1            | His               | C10:3             | C14:2             |
| Phe           | C16:1-OH/C14:1-DC | Asx           | His         | C16:1             | C18             | C14               | C18:1-DC                  | C12           | C5              | C10               | Met               | Gly               |
| C16-OH/C14-DC | C18:2             | C10:2         | Leu/Ile     | 3-Hydroxybutyrate | Orn             | Total ketones     | C18:1                     | C16           | C7-DC           | C10:1             | C16:1-OH/C14:1-DC | Asx               |
| Glx           | C8:1-OH/C6:1-DC   | C6-DC/C8-OH   | Glx         | C7-DC             | C5              | Ala               | C18:2                     | C18:2-OH      | C10-OH/C8-DC    | C16:1-OH/C14:1-DC | Ser               | C20               |
| Pro           | C20:4             | C10           | C18:2       | C10               | C10:3           | Val               | Tyr                       | C18           | C6              | C14:1-OH          | C18:2-OH          | Glx               |
| C20:4         | C12               | C8:1-DC       | C5-OH/C3-DC | C3                | C20             | C5-DC             | C14:1-OH                  | C16-OH/C14-DC | C8:1-OH/C6:1-DC | C18:2             | C8                | Total ketones     |
| Tyr           | C10:1             | C8            | C8          | C18:1             | Cit             | Leu/Ile           | Nonesterified fatty acids | C7-DC         | C10:2           | C10:3             | C16-OH/C14-DC     | Met               |
| C5-OH/C3-DC   | C14:1             | C16-OH/C14-DC | C22         | C10:3             | C20-OH/C18-DC   | C8                | 3-Hydroxybutyrate         | Glx           | Tyr             | C7-DC             | C16:1             | Ala               |
| Arg           | C18:1             | C5:1          | Tyr         | Total ketones     | C8              | C5:1              | C5-OH/C3-DC               | Orn           | Orn             | Pro               | C16:2             | C18:1-OH/C16:1-DC |
| C4/Ci4        | C16:2             | Ser           | Asx         | C5                | His             | C20:4             | C12                       | C5            | C14:1-OH        | C12               | C16               | C18:2             |



|         |                           |       |     |                 |             |                   |               |                   |              |                   |                           |                   |
|---------|---------------------------|-------|-----|-----------------|-------------|-------------------|---------------|-------------------|--------------|-------------------|---------------------------|-------------------|
| C5:1    | C14:2                     | Tyr   | Gly | Val             | C5-OH/C3-DC | C18               | C18           | C8:1-OH/C6:1-DC   | C16:1        | C6-DC/C8-OH       | C18                       | Tyr               |
| Met     | C18                       | Met   | C5  | Cit             | Phe         | C18:1-OH/C16:1-DC | C10-OH/C8-DC  | C18:1-OH/C16:1-DC | C3           | C14               | C14:1-OH                  | C10:1             |
| C3      | Total ketones             | His   | Pro | C20             | C10         | C4/Ci4            | Total ketones | Phe               | C4-DC/Ci4-DC | 3-Hydroxybutyrate | C10                       | C18               |
| Leu/Ile | C14-OH/C12-DC             | Pro   | C20 | C18:2-OH        | Gly         | Glx               | C12:1         | 3-Hydroxybutyrate | C16:2        | C20               | Total ketones             | C16:2             |
| Gly     | C16:1                     | C7-DC | Orn | C8:1-OH/C6:1-DC | C20:4       | Asx               | Phe           | C18-OH/C16-DC     | C10          | Total ketones     | 3-Hydroxybutyrate         | His               |
| Ala     | 3-Hydroxybutyrate         | C5    | Phe | C8:1            | C10:2       | C18-OH/C16-DC     | C20           | Ser               | C8           | C18:1             | Nonesterified fatty acids | C8                |
| Cit     | Nonesterified fatty acids | C5-DC | C6  | Tyr             | C4/Ci4      | C10               | C8            | Total ketones     | Phe          | Arg               | Asx                       | 3-Hydroxybutyrate |

Highlighted in color if an absolute value of factor loads >0.4. Green indicates a positive factor load, while red indicates a negative factor load.

**Supplementary Table 4. Baseline characteristics of patients in the full trial population and metabolomics subset**

| Characteristic                                       | Full trial population<br>N = 263 | Metabolomics subset<br>N = 234 |
|------------------------------------------------------|----------------------------------|--------------------------------|
| <b>Demographics</b>                                  |                                  |                                |
| Age, y                                               | 61 (12)                          | 62 (11)                        |
| Female                                               | 70 (26.6%)                       | 58 (24.8%)                     |
| Race                                                 |                                  |                                |
| White                                                | 144 (54.8%)                      | 131 (56.0%)                    |
| African American                                     | 99 (37.6%)                       | 88 (37.6%)                     |
| Other                                                | 20 (7.6%)                        | 15 (6.4%)                      |
| <b>Medical history</b>                               |                                  |                                |
| Duration of heart failure, y                         | 7.13 (6.30)                      | 7.12 (6.26)                    |
| Previous hospitalization for heart failure           | 209 (79.5%)                      | 187 (79.9%)                    |
| Time since last hospitalization for heart failure, y | 1.61 (2.73)                      | 1.69 (2.85)                    |
| Missing                                              | 54                               | 47                             |
| Ejection fraction, %                                 | 27 (8)                           | 27 (8)                         |
| Ischemic heart disease                               | 139 (52.9%)                      | 123 (52.6%)                    |
| Type 2 diabetes mellitus                             | 166 (63.1%)                      | 149 (63.7%)                    |
| Atrial Fibrillation                                  | 106 (40.3%)                      | 99 (42.3%)                     |
| ICD                                                  | 63 (62.0%)                       | 143 (61.1%)                    |
| CRT                                                  |                                  |                                |
| No                                                   | 95 (58.3%)                       | 85 (59.4%)                     |
| Yes                                                  | 68 (42.7%)                       | 58 (40.6%)                     |
| Missing                                              | 100                              | 91                             |
| <b>Baseline HF/CV medications</b>                    |                                  |                                |
| ACEI/ARB                                             | 141 (53.6%)                      | 129 (55.1%)                    |
| ARNI                                                 | 85 (32.3%)                       | 72 (30.8%)                     |
| β-blocker                                            | 254 (96.6%)                      | 227 (97.0%)                    |
| Hydralazine                                          | 45 (17.1%)                       | 45 (19.2%)                     |
| Long-acting nitrates                                 | 86 (32.7%)                       | 80 (34.2%)                     |
| MRA                                                  | 160 (60.8%)                      | 143 (61.1%)                    |
| Loop diuretics                                       | 225 (85.6%)                      | 199 (85.0%)                    |
| Digoxin                                              | 217 (82.5%)                      | 190 (81.2%)                    |
| Lipid-lowering agents                                | 211 (80.2%)                      | 191 (81.6%)                    |
| Anticoagulant agent                                  | 100 (38.0%)                      | 91 (38.9%)                     |
| <b>Physical exam</b>                                 |                                  |                                |
| Body mass index (median Q1, Q3)                      | 30.6 (27.5, 36.3)                | 31.0 (27.5, 36.2)              |

| Characteristic                                          | Full trial population<br>N = 263 | Metabolomics subset<br>N = 234 |
|---------------------------------------------------------|----------------------------------|--------------------------------|
| Missing                                                 | 5                                | 4                              |
| Heart rate                                              | 72 (12)                          | 72 (12)                        |
| Missing                                                 | 14                               | 12                             |
| Systolic blood pressure                                 | 124 (20)                         | 124 (20)                       |
| Missing                                                 | 1                                | 1                              |
| <b>Baseline laboratory studies</b>                      |                                  |                                |
| NT-proBNP, pg/mL (median Q1, Q3)                        | 1,136 (615, 2,266)               | 1,132 (616, 2,193)             |
| Missing                                                 | 3                                | 2                              |
| BNP, pg/mL (median Q1, Q3)                              | 269 (143, 567)                   | 267 (145, 556)                 |
| Missing                                                 | 3                                | 2                              |
| eGFR, mL/min/1.73m <sup>2</sup>                         | 69 (22)                          | 68 (21)                        |
| Urine albumin/creatinine ratio, mg/g<br>(median Q1, Q3) | 22 (7, 95)                       | 24 (7, 97)                     |
| Missing                                                 | 25                               | 24                             |
| Hemoglobin A1c, %                                       | 7.2 (1.9)                        | 7.1 (1.8)                      |
| Missing                                                 | 1                                | 1                              |
| Hemoglobin, g/dL                                        | 13.4 (1.8)                       | 13.4 (1.8)                     |
| Missing                                                 | 6                                | 4                              |
| <b>Functional measures</b>                              |                                  |                                |
| NYHA Class                                              |                                  |                                |
| Class II                                                | 173 (65.8%)                      | 159 (67.95%)                   |
| Class III                                               | 90 (34.2%)                       | 75 (32.05%)                    |
| KCCQ-OS                                                 | 67 (21)                          | 67 (22)                        |
| KCCQ-CS                                                 | 70 (22)                          | 70 (22)                        |
| 6-minute walk distance, meters (median<br>Q1, Q3)       | 305 (229, 369)                   | 305 (227, 369)                 |
| Missing                                                 | 2                                | 1                              |

Data presented as mean (standard deviation), median (interquartile range), or n (%).

ACE-I, angiotensin converting enzyme inhibitor; ARB, angiotensin receptor blocker; BNP, B-type natriuretic peptide; CRT, cardiac resynchronization therapy; CSS, Clinical Summary Score; eGFR, estimated glomerular filtration rate; ICD, implantable cardioverter-defibrillator; KCCQ, Kansas City Cardiomyopathy Questionnaire; OSS, Overall Summary Score; NT-proBNP, N-terminal pro-B-type natriuretic peptide

**Supplementary Table 5. Baseline characteristics of patients in the metabolomics subset and patients excluded from the subset**

| Characteristic                                       | Metabolomics subset<br>N = 234 | Exclusion subset<br>N = 29 | p-value |
|------------------------------------------------------|--------------------------------|----------------------------|---------|
| <b>Demographics</b>                                  |                                |                            |         |
| Age, y                                               | 62 (11)                        | 55 (14)                    | 0.016   |
| Male                                                 | 176 (75.2%)                    | 17 (58.6%)                 | 0.057   |
| Race                                                 |                                |                            | 0.11    |
| White                                                | 131 (56.0%)                    | 13 (44.8%)                 |         |
| African American                                     | 88 (37.6%)                     | 11 (37.9%)                 |         |
| Other                                                | 15 (6.4%)                      | 5 (17.2%)                  |         |
| <b>Medical history</b>                               |                                |                            |         |
| Duration of heart failure, y                         | 7.12 (6.26)                    | 7.24 (6.69)                | 0.92    |
| Previous hospitalization for heart failure           | 187 (79.9%)                    | 22 (75.9%)                 | 0.61    |
| Time since last hospitalization for heart failure, y | 1.69 (2.85)                    | 0.91 (1.18)                | 0.021   |
| Missing                                              | 47                             | 7                          |         |
| Ejection fraction, %                                 | 27 (8)                         | 26 (8)                     | 0.56    |
| Ischemic heart disease                               | 123 (52.6%)                    | 16 (55.2%)                 | 0.79    |
| Type 2 diabetes mellitus                             | 149 (63.9%)                    | 17 (58.6%)                 | 0.59    |
| Atrial Fibrillation                                  | 99 (42.3%)                     | 7 (24.1%)                  | 0.060   |
| ICD                                                  | 143 (61.1%)                    | 20 (69.0%)                 | 0.41    |
| CRT                                                  |                                |                            | 0.42    |
| No                                                   | 85 (59.4%)                     | 10 (50.0%)                 |         |
| Yes                                                  | 58 (40.6%)                     | 10 (50.0%)                 |         |
| Missing                                              | 91                             | 9                          |         |
| <b>Baseline HF/CV medications</b>                    |                                |                            |         |
| ACEI/ARB                                             | 129 (55.1%)                    | 12 (41.3%)                 | 0.16    |
| Angiotensin receptor neprilysin inhibitor            | 72 (30.8%)                     | 13 (44.8%)                 | 0.13    |
| β-blocker                                            | 227 (97.0%)                    | 27 (93.1%)                 | 0.26    |
| Hydralazine                                          | 45 (19.2%)                     | 0 (0.0%)                   | 0.007   |
| Long-acting nitrates                                 | 80 (34.2%)                     | 6 (20.7%)                  | 0.14    |
| MRA                                                  | 143 (61.1%)                    | 17 (58.6%)                 | 0.80    |
| Loop diuretics                                       | 199 (85.0%)                    | 26 (89.7%)                 | 0.78    |
| Digoxin                                              | 44 (18.8%)                     | 2 (6.9%)                   | 0.11    |
| Lipid-lowering agents                                | 191 (81.6%)                    | 20 (69.0%)                 | 0.11    |
| Anticoagulant agent                                  | 91 (38.9%)                     | 9 (31.0%)                  | 0.41    |

| Characteristic                                                                   | Metabolomics subset<br>N = 234 | Exclusion subset<br>N = 29 | p-value |
|----------------------------------------------------------------------------------|--------------------------------|----------------------------|---------|
| <b>Glucose lowering medications among patients with type 2 diabetes mellitus</b> |                                |                            |         |
| Insulin                                                                          | 76 (51.0%)                     | 11 (64.7%)                 | 0.28    |
| GLP-1RA                                                                          | 4 (2.7%)                       | 1 (5.89%)                  | 0.42    |
| DPP4-inhibitor                                                                   | 19 (12.7%)                     | 2 (11.8%)                  | >0.99   |
| Sulfonylurea                                                                     | 32 (21.5%)                     | 3 (17.7%)                  | >0.99   |
| Metformin                                                                        | 56 (37.6%)                     | 6 (35.3%)                  | 0.85    |
| <b>Physical exam</b>                                                             |                                |                            |         |
| Body mass index (median Q1, Q3)                                                  | 31.0 (27.5, 36.2)              | 30.0 (26.7, 36.7)          | 0.74    |
| Missing                                                                          | 4                              | 1                          |         |
| Heart rate <sup>3</sup>                                                          | 72 (12)                        | 72 (13)                    | 0.85    |
| Missing                                                                          | 12                             | 2                          |         |
| Systolic blood pressure <sup>3</sup>                                             | 124 (20)                       | 119 (22)                   | 0.19    |
| Missing                                                                          | 1                              | 0                          |         |
| <b>Baseline laboratory studies</b>                                               |                                |                            |         |
| NT-proBNP, pg/mL (median Q1, Q3)                                                 | 1,132 (616, 2,193)             | 1,406 (553, 2,372)         | 0.96    |
| Missing                                                                          | 2                              | 1                          |         |
| BNP, pg/mL (median Q1, Q3)                                                       | 267 (145, 556)                 | 340 (122, 629)             | 0.74    |
| Missing                                                                          | 2                              | 1                          |         |
| eGFR, mL/min/1.73m <sup>2</sup>                                                  | 68 (21)                        | 76 (27)                    | 0.17    |
| Urine albumin/creatinine ratio, mg/g (median Q1, Q3)                             | 24 (7, 97)                     | 19 (7, 52)                 | 0.42    |
| Missing                                                                          | 24                             | 1                          |         |
| Hemoglobin A1c, %                                                                | 7.1 (1.8)                      | 7.9 (2.8)                  | 0.12    |
| Missing                                                                          | 1                              | 0                          |         |
| Hemoglobin, g/dL                                                                 | 13.4 (1.8)                     | 13.2 (1.9)                 | 0.59    |
| Missing                                                                          | 4                              | 2                          |         |
| <b>Functional measures</b>                                                       |                                |                            |         |
| NYHA Class                                                                       |                                |                            | 0.035   |
| Class II                                                                         | 159 (68.0%)                    | 14 (48.3%)                 |         |
| Class III                                                                        | 75 (32.1%)                     | 15 (51.7%)                 |         |
| KCCQ-OS                                                                          | 67 (22)                        | 70 (19)                    | 0.39    |
| KCCQ-CS                                                                          | 70 (22)                        | 73 (20)                    | 0.38    |
| 6-minute walk distance, meters (median Q1, Q3)                                   | 305 (227, 369)                 | 314 (254, 354)             | 0.82    |
| Missing                                                                          | 1                              | 1                          |         |

| <b>Characteristic</b> | <b>Metabolomics subset<br/>N = 234</b> | <b>Exclusion subset<br/>N = 29</b> | <b>p-value</b> |
|-----------------------|----------------------------------------|------------------------------------|----------------|
|-----------------------|----------------------------------------|------------------------------------|----------------|

Data presented as mean (standard deviation), median (interquartile range), or n (%).

ACE-I, angiotensin converting enzyme inhibitor; ARB, angiotensin receptor blocker; BNP, B-type natriuretic peptide; CRT, cardiac resynchronization therapy; CSS, Clinical Summary Score; eGFR, estimated glomerular filtration rate; ICD, implantable cardioverter-defibrillator; KCCQ, Kansas City Cardiomyopathy Questionnaire; OSS, Overall Summary Score; NT-proBNP, N-terminal pro-B-type natriuretic peptide

**Supplementary Table 6. Baseline individual metabolite levels by treatment groups**

| Class              | Metabolites     | Dapagliflozin   | Placebo         | p-value |
|--------------------|-----------------|-----------------|-----------------|---------|
| Amino acid (μM)    | Gly             | 326.41 (72.92)  | 308.66 (55.56)  | 0.04    |
| Amino acid (μM)    | Ala             | 444.78 (105.87) | 401.90 (94.01)  | 0.00    |
| Amino acid (μM)    | Ser             | 96.41 (19.10)   | 97.12 (21.32)   | 0.79    |
| Amino acid (μM)    | Pro             | 223.33 (71.34)  | 204.60 (61.18)  | 0.03    |
| Amino acid (μM)    | Val             | 247.42 (59.11)  | 238.26 (46.62)  | 0.19    |
| Amino acid (μM)    | Leu/Ile         | 178.29 (42.40)  | 170.75 (31.94)  | 0.12    |
| Amino acid (μM)    | Met             | 26.95 (5.96)    | 26.54 (5.25)    | 0.58    |
| Amino acid (μM)    | His             | 75.82 (9.67)    | 75.25 (11.60)   | 0.68    |
| Amino acid (μM)    | Phe             | 67.11 (10.00)   | 67.37 (11.43)   | 0.85    |
| Amino acid (μM)    | Tyr             | 71.94 (18.95)   | 69.40 (14.97)   | 0.25    |
| Amino acid (μM)    | Asx             | 63.12 (23.68)   | 58.09 (13.40)   | 0.05    |
| Amino acid (μM)    | Glx             | 123.99 (48.30)  | 122.30 (46.32)  | 0.79    |
| Amino acid (μM)    | Orn             | 89.29 (31.64)   | 86.58 (28.54)   | 0.49    |
| Amino acid (μM)    | Cit             | 42.05 (14.70)   | 41.00 (13.43)   | 0.57    |
| Amino acid (μM)    | Arg             | 72.63 (21.48)   | 71.95 (17.98)   | 0.79    |
| Acylcarnitine (μM) | C2              | 10.29 (4.08)    | 10.03 (3.46)    | 0.60    |
| Acylcarnitine (μM) | C3              | 0.4750 (0.1803) | 0.4429 (0.1631) | 0.15    |
| Acylcarnitine (μM) | C4/Ci4          | 0.3017 (0.1674) | 0.2722 (0.1481) | 0.15    |
| Acylcarnitine (μM) | C5:1            | 0.0641 (0.0178) | 0.0628 (0.0157) | 0.56    |
| Acylcarnitine (μM) | C5              | 0.1655 (0.0748) | 0.1656 (0.0699) | 0.99    |
| Acylcarnitine (μM) | C4-OH           | 0.0702 (0.0605) | 0.0660 (0.0434) | 0.55    |
| Acylcarnitine (μM) | C6              | 0.0946 (0.0605) | 0.0912 (0.0639) | 0.68    |
| Acylcarnitine (μM) | C5-OH/C3-DC     | 0.0477 (0.0165) | 0.0484 (0.0223) | 0.77    |
| Acylcarnitine (μM) | C4-DC/Ci4-DC    | 0.0540 (0.0203) | 0.0515 (0.0176) | 0.32    |
| Acylcarnitine (μM) | C8:1            | 0.4268 (0.2073) | 0.3929 (0.1757) | 0.18    |
| Acylcarnitine (μM) | C8              | 0.2027 (0.1356) | 0.1997 (0.2050) | 0.89    |
| Acylcarnitine (μM) | C5-DC           | 0.0670 (0.0358) | 0.0648 (0.0320) | 0.62    |
| Acylcarnitine (μM) | C8:1-OH/C6:1-DC | 0.0425 (0.0175) | 0.0389 (0.0176) | 0.12    |
| Acylcarnitine (μM) | C6-DC/C8-OH     | 0.1133 (0.0586) | 0.1102 (0.0581) | 0.68    |
| Acylcarnitine (μM) | C10:3           | 0.1225 (0.0547) | 0.1207 (0.0574) | 0.81    |
| Acylcarnitine (μM) | C10:2           | 0.0346 (0.0137) | 0.0345 (0.0146) | 0.93    |
| Acylcarnitine (μM) | C10:1           | 0.2195 (0.0964) | 0.2097 (0.1038) | 0.46    |
| Acylcarnitine (μM) | C10             | 0.3072 (0.2216) | 0.3031 (0.3043) | 0.91    |
| Acylcarnitine (μM) | C7-DC           | 0.0223 (0.0094) | 0.0223 (0.0101) | 0.96    |
| Acylcarnitine (μM) | C8:1-DC         | 0.0479 (0.0187) | 0.0455 (0.0217) | 0.38    |
| Acylcarnitine (μM) | C10-OH/C8-DC    | 0.0747 (0.0296) | 0.0745 (0.0341) | 0.97    |
| Acylcarnitine (μM) | C12:1           | 0.1475 (0.0610) | 0.1424 (0.0708) | 0.56    |
| Acylcarnitine (μM) | C12             | 0.1088 (0.0639) | 0.1061 (0.0756) | 0.77    |
| Acylcarnitine (μM) | C12-OH/C10-DC   | 0.0162 (0.0068) | 0.0155 (0.0074) | 0.44    |
| Acylcarnitine (μM) | C14:2           | 0.0668 (0.0329) | 0.0675 (0.0419) | 0.89    |
| Acylcarnitine (μM) | C14:1           | 0.1045 (0.0557) | 0.1055 (0.0650) | 0.90    |
| Acylcarnitine (μM) | C14             | 0.0384 (0.0193) | 0.0376 (0.0193) | 0.77    |
| Acylcarnitine (μM) | C14:1-OH        | 0.0193 (0.0078) | 0.0184 (0.0079) | 0.37    |
| Acylcarnitine (μM) | C14-OH/C12-DC   | 0.0110 (0.0055) | 0.0105 (0.0052) | 0.54    |
| Acylcarnitine (μM) | C16:2           | 0.0127 (0.0089) | 0.0126 (0.0098) | 0.93    |
| Acylcarnitine (μM) | C16:1           | 0.0321 (0.0236) | 0.0305 (0.0175) | 0.55    |
| Acylcarnitine (μM) | C16             | 0.1052 (0.0353) | 0.1037 (0.0306) | 0.72    |

|                                  |                   |                 |                 |      |
|----------------------------------|-------------------|-----------------|-----------------|------|
| Acylcarnitine (μM)               | C16:1-OH/C14:1-DC | 0.0097 (0.0036) | 0.0097 (0.0035) | 0.96 |
| Acylcarnitine (μM)               | C16-OH/C14-DC     | 0.0070 (0.0041) | 0.0060 (0.0027) | 0.03 |
| Acylcarnitine (μM)               | C18:2             | 0.0890 (0.0373) | 0.0917 (0.0344) | 0.56 |
| Acylcarnitine (μM)               | C18:1             | 0.1451 (0.0606) | 0.1479 (0.0588) | 0.71 |
| Acylcarnitine (μM)               | C18               | 0.0489 (0.0172) | 0.0484 (0.0147) | 0.82 |
| Acylcarnitine (μM)               | C18:2-OH          | 0.0058 (0.0021) | 0.0060 (0.0021) | 0.62 |
| Acylcarnitine (μM)               | C18:1-OH/C16:1-DC | 0.0071 (0.0038) | 0.0063 (0.0034) | 0.11 |
| Acylcarnitine (μM)               | C18-OH/C16-DC     | 0.0097 (0.0047) | 0.0093 (0.0046) | 0.51 |
| Acylcarnitine (μM)               | C20:4             | 0.0090 (0.0038) | 0.0093 (0.0047) | 0.54 |
| Acylcarnitine (μM)               | C20               | 0.0057 (0.0064) | 0.0048 (0.0025) | 0.19 |
| Acylcarnitine (μM)               | C18:1-DC          | 0.0139 (0.0065) | 0.0149 (0.0088) | 0.31 |
| Acylcarnitine (μM)               | C20-OH/C18-DC     | 0.0138 (0.0059) | 0.0148 (0.0071) | 0.26 |
| Acylcarnitine (μM)               | C22               | 0.0044 (0.0023) | 0.0047 (0.0025) | 0.38 |
| Conventional metabolite (μmol/L) | 3-Hydroxybutyrate | 81.12 (91.54)   | 97.75 (95.94)   | 0.18 |
| Conventional metabolite (μmol/L) | Total ketones     | 105.17 (110.12) | 124.39 (109.87) | 0.18 |
| Conventional metabolite (mmol/L) | NEFA              | 0.4999 (0.2453) | 0.5290 (0.2727) | 0.39 |

Concentrations reported as mean (standard deviation).



**Supplementary Table 7. Interaction analysis of treatment and background use of medical therapies on principal components analysis defined metabolite clusters**

| Factors   | Annotations for factors                                   | Treatment*MRA   |                       | Treatment*ARNI  |                       |
|-----------|-----------------------------------------------------------|-----------------|-----------------------|-----------------|-----------------------|
|           |                                                           | Nominal P value | FDR corrected P value | Nominal P value | FDR corrected P value |
| Factor 1  | Medium-chain acylcarnitines                               | 0.81            | 0.82                  | 0.62            | 0.82                  |
| Factor 2  | Branched-chain and aromatic amino acids                   | 0.70            | 0.82                  | 0.95            | 0.95                  |
| Factor 3  | Long-chain acylcarnitines                                 | 0.09            | 0.51                  | 0.22            | 0.58                  |
| Factor 4  | Long-chain dicarboxyl acylcarnitines                      | 0.79            | 0.82                  | 0.88            | 0.95                  |
| Factor 5  | Miscellaneous amino acids                                 | 0.49            | 0.82                  | 0.95            | 0.95                  |
| Factor 6  | Ketone-related metabolites and short-chain acylcarnitines | 0.12            | 0.51                  | 0.20            | 0.58                  |
| Factor 7  | Medium-chain acylcarnitines                               | 0.82            | 0.82                  | 0.31            | 0.67                  |
| Factor 8  | Miscellaneous amino acids                                 | 0.20            | 0.66                  | 0.01            | 0.18                  |
| Factor 9  | Long-chain acylcarnitines                                 | 0.44            | 0.82                  | 0.63            | 0.82                  |
| Factor 10 | Miscellaneous amino acids                                 | 0.07            | 0.51                  | 0.21            | 0.58                  |
| Factor 11 | Branched-chain amino acids and short-chain acylcarnitines | 0.64            | 0.82                  | 0.21            | 0.58                  |
| Factor 12 | Miscellaneous amino acids                                 | 0.51            | 0.82                  | 0.58            | 0.82                  |
| Factor 13 | Short-chain dicarboxyl acylcarnitines                     | 0.37            | 0.82                  | 0.44            | 0.82                  |

Model adjusted for randomized treatment group, MRA or ARNI, baseline factor level, age, race/ethnicity, sex, eGFR, and type 2 diabetes mellitus.

FDR, false discovery rate; MRA, mineralocorticoid antagonist; ARNI, angiotensin-receptor/neprilysin inhibitor.

**Supplementary Table 8. Longitudinal differences in metabolites by treatment group**

| Metabolites               | PCA factors | Dapagliflozin, N = 121  |                         |             |         | Placebo, N = 113        |                         |             |         |
|---------------------------|-------------|-------------------------|-------------------------|-------------|---------|-------------------------|-------------------------|-------------|---------|
|                           |             | Mean of the Differences | 95% Confidence Interval |             | p-value | Mean of the Differences | 95% Confidence Interval |             | p-value |
|                           |             |                         | Lower level             | Upper level |         |                         | Lower level             | Upper level |         |
| C2                        | factor 6    | 1.0498                  | 0.2997                  | 1.7998      | 0.001   | 0.2227                  | -0.4667                 | 0.9122      | 0.52    |
| C4-OH                     | factor 6    | 0.0147                  | 0.0051                  | 0.0242      | 0.003   | -0.0004                 | -0.0093                 | 0.0085      | 0.93    |
| 3-Hydroxybutyrate         | factor 6    | 29.3826                 | 8.0970                  | 50.6683     | 0.007   | -17.0000                | -35.4934                | 1.4934      | 0.07    |
| Total ketones             | factor 6    | 32.2620                 | 6.7946                  | 57.7294     | 0.02    | -18.5637                | -40.9366                | 3.8092      | 0.10    |
| Nonesterified fatty acids | factor 6    | 0.0215                  | -0.0316                 | 0.0746      | 0.42    | -0.0396                 | -0.0961                 | 0.0170      | 0.17    |
| C8:1                      | factor 7    | 0.0432                  | 0.0063                  | 0.0801      | 0.02    | 0.0156                  | -0.0152                 | 0.0464      | 0.32    |
| C10:3                     | factor 7    | 0.0121                  | 0.0027                  | 0.0214      | 0.01    | 0.0003                  | -0.0082                 | 0.0088      | 0.95    |
| C10:2                     | factor 7    | 0.0051                  | 0.0019                  | 0.0083      | 0.002   | -0.0002                 | -0.0027                 | 0.0023      | 0.88    |
| C10:1                     | factor 7    | 0.0120                  | -0.0066                 | 0.0305      | 0.20    | 0.0036                  | -0.0158                 | 0.0230      | 0.72    |
| C8:1-DC                   | factor 7    | 0.0065                  | 0.0026                  | 0.0104      | 0.001   | 0.0001                  | -0.0032                 | 0.0034      | 0.95    |
| C12:1                     | factor 7    | 0.0076                  | -0.0058                 | 0.0211      | 0.26    | -0.0038                 | -0.0172                 | 0.0096      | 0.57    |

Paired T-test used for statistical comparisons. Differences defined by follow-up visit minus baseline visit.  
PCA, principal components analysis.

**Supplementary Table 9. Placebo-adjusted changes in metabolites from baseline to follow-up**

| Metabolites                  | PCA factors | Placebo-adjusted<br>mean of the<br>differences | 95% Confidence Interval |             | p-value |
|------------------------------|-------------|------------------------------------------------|-------------------------|-------------|---------|
|                              |             |                                                | Lower level             | Upper level |         |
| C2                           | factor 6    | 0.8270                                         | -0.1864                 | 1.8405      | 0.11    |
| C4-OH                        | factor 6    | 0.0150                                         | 0.0020                  | 0.0281      | 0.02    |
| 3-Hydroxybutyrate            | factor 6    | 46.3826                                        | 18.3305                 | 74.4348     | 0.001   |
| Total ketones                | factor 6    | 50.8257                                        | 17.1017                 | 84.5497     | 0.003   |
| Nonesterified fatty<br>acids | factor 6    | 0.0610                                         | -0.0161                 | 0.1382      | 0.12    |
| C8:1                         | factor 7    | 0.0276                                         | -0.0202                 | 0.0754      | 0.26    |
| C10:3                        | factor 7    | 0.0118                                         | -0.0008                 | 0.0244      | 0.07    |
| C10:2                        | factor 7    | 0.0053                                         | 0.0013                  | 0.0093      | 0.01    |
| C10:1                        | factor 7    | 0.0084                                         | -0.0183                 | 0.0351      | 0.54    |
| C8:1-DC                      | factor 7    | 0.0064                                         | 0.0013                  | 0.0115      | 0.01    |
| C12:1                        | factor 7    | 0.0114                                         | -0.0074                 | 0.0303      | 0.23    |

Two samples T-test used for statistical comparisons. Differences defined by follow-up visit minus baseline visit.  
PCA, principal components analysis.

**Supplementary Table 10. Covariate predictors of change in beta-hydroxybutyrate levels in all study participants.**

| Characteristic                             | Estimates | 95% confidence interval |         | p-value | LASSO p-value |
|--------------------------------------------|-----------|-------------------------|---------|---------|---------------|
|                                            |           | lower                   | upper   |         |               |
| <b>Treatment arm</b>                       | 40.582    | 10.195                  | 70.969  | 0.01    | 0.003         |
| <b>Baseline beta-hydroxybutyrate</b>       | -0.513    | -0.675                  | -0.352  | < 0.001 | <0.001        |
| <b>Demographics</b>                        |           |                         |         |         |               |
| Age, y                                     | 0.271     | -1.729                  | 2.271   | 0.80    | -             |
| Male                                       | -61.237   | -99.53                  | -22.943 | 0.002   | -             |
| Race                                       |           |                         |         |         |               |
| African American                           | ref       | ref                     | ref     |         |               |
| White                                      | -4.699    | -44.837                 | 35.438  | 0.74    | -             |
| Other                                      | -11.704   | -80.567                 | 57.159  | 0.82    | -             |
| <b>Medical history</b>                     |           |                         |         |         |               |
| Previous hospitalization for heart failure | 6.112     | -34.558                 | 46.782  | 0.77    | -             |
| Ejection fraction, %                       | -0.804    | -3.013                  | 1.404   | 0.48    | -             |
| Ischemic heart disease                     | 44.27     | 9.934                   | 78.606  | 0.01    | -             |
| Type 2 diabetes mellitus                   | -5.521    | -43.117                 | 32.075  | 0.77    | -             |
| Atrial Fibrillation                        | 36.548    | 3.812                   | 69.284  | 0.03    | -             |
| <b>Baseline HF/CV medications</b>          |           |                         |         |         |               |
| ACEI/ARB                                   | -21.796   | -64.117                 | 20.524  | 0.31    | -             |
| Angiotensin receptor neprilysin inhibitor  | -13.715   | -60.383                 | 32.953  | 0.57    | -             |
| β-blocker                                  | 39.873    | -48.173                 | 127.918 | 0.38    | -             |
| Hydralazine                                | 47.165    | -1.451                  | 95.78   | 0.06    | -             |
| Long-acting nitrates                       | -16.787   | -53.277                 | 19.702  | 0.37    | -             |

| Characteristic                       | Estimates | 95% confidence interval |         | p-value | LASSO p-value |
|--------------------------------------|-----------|-------------------------|---------|---------|---------------|
|                                      |           | lower                   | upper   |         |               |
| MRA                                  | 18.216    | -14.344                 | 50.777  | 0.27    | -             |
| Loop diuretics                       | -30.918   | -76.171                 | 14.334  | 0.18    | -             |
| Digoxin                              | -37.341   | -79.243                 | 4.562   | 0.08    | -             |
| Lipid-lowering agents                | -56.691   | -101.068                | -12.314 | 0.01    | 0.009         |
| <b>Physical exam</b>                 |           |                         |         |         |               |
| Body mass index                      | -0.434    | -3.195                  | 2.327   | 0.76    | -             |
| Heart rate                           | 0.066     | -1.313                  | 1.446   | 0.93    | -             |
| Systolic blood pressure              | -0.619    | -1.446                  | 0.208   | 0.14    | -             |
| <b>Baseline laboratory studies</b>   |           |                         |         |         |               |
| NT-proBNP, pg/mL                     | -0.00041  | -0.00743                | 0.00661 | 0.91    | -             |
| eGFR, mL/min/1.73m <sup>2</sup>      | 1.109     | 0.254                   | 1.965   | 0.01    | -             |
| Urine albumin/creatinine ratio, mg/g | 0.031     | 0.007                   | 0.056   | 0.01    | -             |
| Hemoglobin A1c, %                    | -7.022    | -17.13                  | 3.086   | 0.18    | -             |
| <b>Functional measures</b>           |           |                         |         |         |               |
| NYHA Class                           |           |                         |         |         |               |
| Class II                             | ref       | ref                     |         |         |               |
| Class III                            | -20.529   | -55.516                 | 14.459  | 0.25    | -             |
| KCCQ-OSS                             | -0.619    | -1.456                  | 0.217   | 0.15    | -             |
| 6-minute walk distance, meters       | 0.001     | -0.179                  | 0.182   | 0.99    | -             |

ACE-I, angiotensin converting enzyme inhibitor; ARB, angiotensin receptor blocker; eGFR, estimated glomerular filtration rate; LASSO, Least Absolute Shrinkage and Selection Operator; KCCQ, Kansas City Cardiomyopathy Questionnaire; OSS, Overall Summary Score; NT-proBNP, N-terminal pro-B-type natriuretic peptide

**Supplementary Table 11. Association of baseline PCA metabolite factors with changes in quality of life and natriuretic peptides.**

| Baseline factor | Factor description                                        | log NT-proBNP   |                       | KCCQ-OSS        |                       | KCCQ-CSS        |                       |
|-----------------|-----------------------------------------------------------|-----------------|-----------------------|-----------------|-----------------------|-----------------|-----------------------|
|                 |                                                           | Nominal P value | FDR corrected P value | Nominal P value | FDR corrected P value | Nominal P value | FDR corrected P value |
| Factor 1        | Medium-chain acylcarnitines                               | 0.59            | 0.99                  | 0.10            | 0.36                  | 0.38            | 0.81                  |
| Factor 2        | Branched-chain and aromatic amino acids                   | 0.26            | 0.85                  | 0.04            | 0.36                  | 0.06            | 0.73                  |
| Factor 3        | Long-chain acylcarnitines                                 | 0.93            | 0.99                  | 0.31            | 0.76                  | 0.47            | 0.81                  |
| Factor 4        | Long-chain dicarboxyl acylcarnitines                      | 0.47            | 0.99                  | 0.11            | 0.36                  | 0.19            | 0.81                  |
| Factor 5        | Miscellaneous amino acids                                 | 0.54            | 0.99                  | 0.11            | 0.36                  | 0.17            | 0.81                  |
| Factor 6        | Ketone-related metabolites and short-chain acylcarnitines | 0.09            | 0.57                  | 0.59            | 0.76                  | 0.44            | 0.81                  |
| Factor 7        | Medium-chain acylcarnitines                               | 0.90            | 0.99                  | 0.45            | 0.76                  | 0.43            | 0.81                  |
| Factor 8        | Miscellaneous amino acids                                 | 0.65            | 0.99                  | 0.65            | 0.76                  | 0.75            | 0.84                  |
| Factor 9        | Long-chain acylcarnitines                                 | 0.99            | 0.99                  | 0.99            | 0.99                  | 0.91            | 0.91                  |
| Factor 10       | Miscellaneous amino acids                                 | 0.24            | 0.85                  | 0.38            | 0.76                  | 0.62            | 0.81                  |
| Factor 11       | Branched-chain amino acids and short-chain acylcarnitines | 0.69            | 0.99                  | 0.55            | 0.76                  | 0.77            | 0.84                  |
| Factor 12       | Miscellaneous amino acids                                 | 0.91            | 0.99                  | 0.88            | 0.95                  | 0.57            | 0.81                  |
| Factor 13       | Short-chain dicarboxyl acylcarnitines                     | 0.08            | 0.57                  | 0.51            | 0.76                  | 0.62            | 0.81                  |

Model adjusted for baseline value of the respective outcome, age, race/ethnicity, sex, eGFR, and type 2 diabetes mellitus. CSS, clinical summary score; eGFR, estimated glomerular filtration rate; FDR, false discovery rate; KCCQ, Kansas City Cardiomyopathy Questionnaire; NT-proBNP, N-terminal pro B-type natriuretic peptide; OSS, overall summary score.

**Supplementary Table 12. Association between changes in individual metabolites from significant PCA factors and changes in log NT-proBNP**

| Metabolites       | PCA factors | per 1 $\mu\text{m}$ increase in the metabolites |                         |             | per 1 SD increase in the metabolites |                         |             | P value |
|-------------------|-------------|-------------------------------------------------|-------------------------|-------------|--------------------------------------|-------------------------|-------------|---------|
|                   |             | Estimate                                        | 95% Confidence Interval |             | Estimate                             | 95% Confidence Interval |             |         |
|                   |             |                                                 | Lower Level             | Upper Level |                                      | Lower Level             | Upper Level |         |
| C6                | Factor 3    | 0.7567                                          | -0.4082                 | 1.9215      | 0.0528                               | -0.0285                 | 0.1342      | 0.20    |
| C14               | Factor 3    | 8.8555                                          | 4.1008                  | 13.6101     | 0.1509                               | 0.0699                  | 0.2319      | <0.001  |
| C16:2             | Factor 3    | 13.7736                                         | 5.2252                  | 22.3219     | 0.1349                               | 0.0512                  | 0.2187      | 0.002   |
| C16:1             | Factor 3    | 8.5320                                          | 3.8868                  | 13.1771     | 0.1532                               | 0.0698                  | 0.2365      | <0.001  |
| C16               | Factor 3    | 5.5552                                          | 2.7980                  | 8.3124      | 0.1657                               | 0.0835                  | 0.2480      | <0.001  |
| C16:1-OH/C14:1-DC | Factor 3    | 30.1686                                         | 9.8210                  | 50.5162     | 0.1313                               | 0.0427                  | 0.2198      | 0.004   |
|                   | Factor 4    |                                                 |                         |             |                                      |                         |             |         |
| C18:2             | Factor 4    | 3.1145                                          | 0.5086                  | 5.7204      | 0.1009                               | 0.0165                  | 0.1854      | 0.02    |
| C18:1             | Factor 4    | 3.2750                                          | 1.7176                  | 4.8324      | 0.1772                               | 0.0929                  | 0.2614      | <0.001  |
| C18               | Factor 4    | 8.5264                                          | 2.7793                  | 14.2734     | 0.1189                               | 0.0388                  | 0.1991      | 0.004   |
| C20:4             | Factor 4    | 11.1365                                         | -13.1164                | 35.3893     | 0.0424                               | -0.0499                 | 0.1346      | 0.37    |
| C20               | Factor 4    | 24.3769                                         | -6.3662                 | 55.1200     | 0.0650                               | -0.0170                 | 0.1469      | 0.12    |
| C10-OH/C8-DC      | Factor 4    | 5.2665                                          | 2.7659                  | 7.7672      | 0.1761                               | 0.0925                  | 0.2596      | <0.001  |
| C12:1             | Factor 4    | 2.4091                                          | 1.2471                  | 3.5711      | 0.1769                               | 0.0916                  | 0.2623      | <0.001  |
| C12-OH/C10-DC     | Factor 4    | 27.2625                                         | 16.0086                 | 38.5165     | 0.2028                               | 0.1191                  | 0.2865      | <0.001  |
| C14:1-OH          | Factor 4    | 24.4947                                         | 14.0029                 | 34.9865     | 0.2078                               | 0.1188                  | 0.2968      | <0.001  |
| C14-OH/C12-DC     | Factor 4    | 32.4209                                         | 14.1851                 | 50.6568     | 0.1671                               | 0.0731                  | 0.2611      | <0.001  |
| C16-OH/C14-DC     | Factor 4    | 49.0450                                         | 22.8524                 | 75.2375     | 0.1788                               | 0.0833                  | 0.2743      | <0.001  |
| C18:2-OH          | Factor 4    | 47.0665                                         | 11.9816                 | 82.1514     | 0.1307                               | 0.0333                  | 0.2281      | 0.009   |
| C18:1-OH/C16:1-DC | Factor 4    | 71.3590                                         | 44.3613                 | 98.3566     | 0.2658                               | 0.1653                  | 0.3664      | <0.001  |
| C18-OH/C16-DC     | Factor 4    | 27.9584                                         | 8.0796                  | 47.8371     | 0.1444                               | 0.0417                  | 0.2470      | 0.006   |
| C18:1-DC          | Factor 4    | 21.8630                                         | 10.9756                 | 32.7504     | 0.1806                               | 0.0907                  | 0.2706      | <0.001  |
| C20-OH/C18-DC     | Factor 4    | 18.1866                                         | 3.8063                  | 32.5669     | 0.1127                               | 0.0236                  | 0.2018      | 0.01    |
| Ala               | Factor 10   | -0.0008                                         | -0.0017                 | 0.0001      | -0.0745                              | -0.1575                 | 0.0076      | 0.08    |

|     |           |         |         |         |         |         |         |       |
|-----|-----------|---------|---------|---------|---------|---------|---------|-------|
| Pro | Factor 10 | -0.0019 | -0.0033 | -0.0005 | -0.1104 | -0.1926 | -0.0276 | 0.001 |
| His | Factor 10 | -0.0091 | -0.0170 | -0.0011 | -0.0939 | -0.1760 | -0.0117 | 0.03  |

Model adjusted for baseline metabolites level, baseline value of the respective outcome, age, race/ethnicity, sex, eGFR, and type 2 diabetes mellitus.

eGFR, estimated glomerular filtration rate; NT-proBNP, N-terminal pro B-type natriuretic peptide; SD, standard deviation.



**Supplementary Table 13. Association between changes in individual metabolites from significant PCA factors and changes in KCCQ-OSS**

| Metabolites       | PCA factors     | per 1 $\mu\text{m}$ increase in the metabolites |                         |             | per 1 SD increase in the metabolites |                         |             | P value |
|-------------------|-----------------|-------------------------------------------------|-------------------------|-------------|--------------------------------------|-------------------------|-------------|---------|
|                   |                 | Estimate                                        | 95% Confidence Interval |             | Estimate                             | 95% Confidence Interval |             |         |
|                   |                 |                                                 | Lower Level             | Upper Level |                                      | Lower Level             | Upper Level |         |
| Val               | Factor 2        | -0.0254                                         | -0.0703                 | 0.0195      | -1.1686                              | -3.2355                 | 0.8984      | 0.27    |
| Leu/Ile           | Factor 2        | -0.0472                                         | -0.0960                 | 0.0017      | -1.9565                              | -3.9830                 | 0.0701      | 0.06    |
| Met               | Factor 2        | -0.2857                                         | -0.5825                 | 0.0111      | -1.8932                              | -3.8598                 | 0.0734      | 0.06    |
| His               | Factor 2        | 0.0254                                          | -0.1625                 | 0.2133      | 0.2634                               | -1.6857                 | 2.2125      | 0.79    |
| Phe               | Factor 2        | -0.2717                                         | -0.4183                 | -0.1252     | -3.4388                              | -5.2933                 | -1.5844     | <0.001  |
| Tyr               | Factor 2        | -0.2167                                         | -0.3528                 | -0.0806     | -2.9509                              | -4.8041                 | -1.0975     | 0.002   |
| C6                | Factor 2        | -28.0918                                        | -55.3097                | -0.8739     | -1.9613                              | -3.8616                 | -0.0610     | 0.04    |
| C14               | Factor 3        | -224.7993                                       | -335.2717               | -114.3270   | -3.8311                              | -5.7137                 | -1.9484     | <0.001  |
| C16:2             | Factor 3        | -356.5196                                       | -555.0674               | -157.9718   | -3.4925                              | -5.4376                 | -1.5475     | <0.001  |
| C16:1             | Factor 3        | -208.8487                                       | -317.2145               | -100.4829   | -3.7492                              | -5.6945                 | -1.8038     | <0.001  |
| C16               | Factor 3        | -151.7660                                       | -215.7578               | -87.7741    | -4.5280                              | -6.4372                 | -2.6188     | <0.001  |
| C16:1-OH/C14:1-DC | Factors 3 and 4 | -1038.4460                                      | -1505.0844              | -571.8076   | -4.5182                              | -6.5485                 | -2.4879     | <0.001  |
| C18:2             | Factor 3        | -121.8782                                       | -181.6297               | -62.1268    | -3.9501                              | -5.8867                 | -2.0136     | <0.001  |
| C18:1             | Factor 3        | -84.9478                                        | -121.2790               | -48.6166    | -4.5959                              | -6.5616                 | -2.6303     | <0.001  |
| C18               | Factor 3        | -321.2520                                       | -451.9517               | -190.5523   | -4.4803                              | -6.3031                 | -2.6575     | <0.001  |
| C20:4             | Factor 3        | -907.6343                                       | -1464.9672              | -350.3014   | -3.4526                              | -5.5726                 | -1.3325     | 0.002   |
| C20               | Factor 3        | 10.7846                                         | -710.3796               | 731.9488    | 0.0287                               | -1.8936                 | 1.9511      | 0.98    |
| C10-OH/C8-DC      | Factor 4        | -98.4560                                        | -158.1035               | -38.8086    | -3.2912                              | -5.2851                 | -1.2973     | 0.001   |
| C12:1             | Factor 4        | -37.8611                                        | -65.7265                | -9.9957     | -2.7806                              | -4.8271                 | -0.7341     | 0.008   |
| C12-OH/C10-DC     | Factor 4        | -638.2197                                       | -902.6208               | -373.8186   | -4.7474                              | -6.7142                 | -2.7807     | <0.001  |
| C14:1-OH          | Factor 4        | -502.8506                                       | -750.0533               | -255.6478   | -4.2654                              | -6.3623                 | -2.1685     | <0.001  |
| C14-OH/C12-DC     | Factor 4        | -597.4505                                       | -1026.6952              | -168.2058   | -3.0790                              | -5.2912                 | -0.8669     | 0.007   |
| C16-OH/C14-DC     | Factor 4        | -1003.7674                                      | -1625.0527              | -382.4822   | -3.6601                              | -5.9256                 | -1.3947     | 0.002   |
| C18:2-OH          | Factor 4        | -799.8900                                       | -1630.7208              | 30.9407     | -2.2207                              | -4.5274                 | 0.0859      | 0.06    |
| C18:1-OH/C16:1-DC | Factor 4        | -1105.6420                                      | -1745.5732              | -465.7108   | -4.1187                              | -6.5026                 | -1.7349     | <0.001  |

|               |          |           |            |           |         |         |         |        |
|---------------|----------|-----------|------------|-----------|---------|---------|---------|--------|
| C18-OH/C16-DC | Factor 4 | -670.3198 | -1134.2019 | -206.4378 | -3.4611 | -5.8562 | -1.0659 | 0.005  |
| C18:1-DC      | Factor 4 | -473.6655 | -728.5339  | -218.7971 | -3.9138 | -6.0197 | -1.8079 | <0.001 |
| C20-OH/C18-DC | Factor 4 | -557.7662 | -891.3908  | -224.1417 | -3.4554 | -5.5222 | -1.3886 | 0.001  |

Model adjusted for baseline metabolites level, baseline value of KCCQ-OSS, age, race/ethnicity, sex, eGFR, and type 2 diabetes mellitus.

eGFR, estimated glomerular filtration rate; KCCQ, Kansas City Cardiomyopathy Questionnaire; OSS, overall summary score; SD, standard deviation.

**Supplementary Table 14. Association between changes in individual metabolites from significant PCA factors and changes in KCCQ-CSS**

| Metabolites       | PCA factors     | per 1 $\mu\text{m}$ increase in the metabolites |                         |             | per 1 SD increase in the metabolites |                         |             | P value |
|-------------------|-----------------|-------------------------------------------------|-------------------------|-------------|--------------------------------------|-------------------------|-------------|---------|
|                   |                 | Estimate                                        | 95% Confidence Interval |             | Estimate                             | 95% Confidence Interval |             |         |
|                   |                 |                                                 | Lower Level             | Upper Level |                                      | Lower Level             | Upper Level |         |
| Val               | Factor 2        | -0.0280                                         | -0.0744                 | 0.0184      | -1.2887                              | -3.4224                 | 0.8455      | 0.24    |
| Leu/Ile           | Factor 2        | -0.0427                                         | -0.0934                 | 0.0080      | -1.7710                              | -3.8760                 | 0.3335      | 0.10    |
| Met               | Factor 2        | -0.2636                                         | -0.5732                 | 0.0459      | -1.7468                              | -3.7977                 | 0.3041      | 0.10    |
| His               | Factor 2        | -0.0085                                         | -0.2035                 | 0.1865      | -0.0879                              | -2.1101                 | 1.9343      | 0.93    |
| Phe               | Factor 2        | -0.2533                                         | -0.4049                 | -0.1017     | -3.2054                              | -5.1241                 | -1.2866     | 0.001   |
| Tyr               | Factor 2        | -0.1884                                         | -0.3296                 | -0.0472     | -2.5660                              | -4.4889                 | -0.6431     | 0.001   |
| C6                | Factor 3        | -16.3054                                        | -44.7043                | 12.0935     | -1.1384                              | -3.1212                 | 0.8443      | 0.26    |
| C14               | Factor 3        | -173.1681                                       | -290.0124               | -56.3238    | -2.9511                              | -4.9424                 | -0.9599     | 0.004   |
| C16:2             | Factor 3        | -261.8969                                       | -471.3399               | -52.4538    | -2.5656                              | -4.6173                 | -0.5138     | 0.02    |
| C16:1             | Factor 3        | -152.9024                                       | -267.5518               | -38.2530    | -2.7448                              | -4.8030                 | -0.6867     | 0.01    |
| C16               | Factor 3        | -131.4214                                       | -198.7189               | -64.1239    | -3.9210                              | -5.9288                 | -1.9131     | <0.001  |
| C16:1-OH/C14:1-DC | Factors 3 and 4 | -910.6958                                       | -1400.0609              | -421.3306   | -3.9624                              | -6.0915                 | -1.8332     | <0.001  |
| C18:2             | Factor 3        | -99.3278                                        | -162.1287               | -36.5270    | -3.2193                              | -5.2547                 | -1.1839     | 0.002   |
| C18:1             | Factor 3        | -67.5381                                        | -105.8663               | -29.2098    | -3.6540                              | -5.7277                 | -1.5803     | <0.001  |
| C18               | Factor 3        | -293.1731                                       | -430.1823               | -156.1640   | -4.0887                              | -5.9995                 | -2.1779     | <0.001  |
| C20:4             | Factor 3        | -915.2152                                       | -1493.2457              | -337.1846   | -3.4814                              | -5.6802                 | -1.2826     | 0.002   |
| C20               | Factor 3        | -242.2251                                       | -989.8168               | 505.3667    | -0.6457                              | -2.6385                 | 1.3471      | 0.53    |
| C10-OH/C8-DC      | Factor 4        | -56.2142                                        | -118.5020               | 6.0735      | -1.8791                              | -3.9613                 | 0.2030      | 0.08    |
| C12:1             | Factor 4        | -18.0521                                        | -47.0276                | 10.9234     | -1.3258                              | -3.4538                 | 0.8022      | 0.22    |
| C12-OH/C10-DC     | Factor 4        | -488.5785                                       | -766.8659               | -210.2911   | -3.6343                              | -5.7044                 | -1.5643     | <0.001  |
| C14:1-OH          | Factor 4        | -319.4123                                       | -579.5619               | -59.2627    | -2.7094                              | -4.9161                 | -0.5027     | 0.02    |
| C14-OH/C12-DC     | Factor 4        | -482.9458                                       | -927.0343               | -38.8573    | -2.4889                              | -4.7776                 | -0.2003     | 0.03    |
| C16-OH/C14-DC     | Factor 4        | -745.4747                                       | -1396.0123              | -94.9370    | -2.7183                              | -5.0904                 | -0.3462     | 0.03    |
| C18:2-OH          | Factor 4        | -                                               | -1870.9372              | -157.9654   | -2.8164                              | -5.1943                 | -0.4386     | 0.02    |
|                   |                 | 1014.4513                                       |                         |             |                                      |                         |             |         |

|                   |          |           |            |           |         |         |         |        |
|-------------------|----------|-----------|------------|-----------|---------|---------|---------|--------|
| C18:1-OH/C16:1-DC | Factor 4 | -895.5127 | -1567.1581 | -223.8672 | -3.3359 | -5.8379 | -0.8339 | 0.01   |
| C18-OH/C16-DC     | Factor 4 | -743.2855 | -1222.1830 | -264.3880 | -3.8378 | -6.3105 | -1.3651 | 0.003  |
| C18:1-DC          | Factor 4 | -518.0911 | -780.8140  | -255.3682 | -4.2809 | -6.4517 | -2.1101 | <0.001 |
| C20-OH/C18-DC     | Factor 4 | -507.6468 | -855.1818  | -160.1118 | -3.1449 | -5.2979 | -0.9919 | 0.005  |

Model adjusted for baseline metabolites level, baseline value of KCCQ-CSS, age, race/ethnicity, sex, eGFR, and type 2 diabetes mellitus.

CSS, clinical summary score; eGFR, estimated glomerular filtration rate; KCCQ, Kansas City Cardiomyopathy Questionnaire; SD, standard deviation.

## Supplemental Figure 1.

### Title: Heatmap of Correlation Between Changes in Trial Endpoints and Changes in Metabolites.

**Caption:** Heatmap cluster correlation matrix is depicted for the relationship between changes in trial endpoints (KCCQ-OSS, KCCQ-CSS, and NT-proBNP) with change in metabolites from baseline to 12 weeks in the entire metabolomics substudy. See Supplementary Table 1 for abbreviations. CSS, clinical summary score; KCCQ, Kansas City Cardiomyopathy Questionnaire; NT-proBNP, N-terminal pro-B-type natriuretic peptide. OSS, overall summary score.

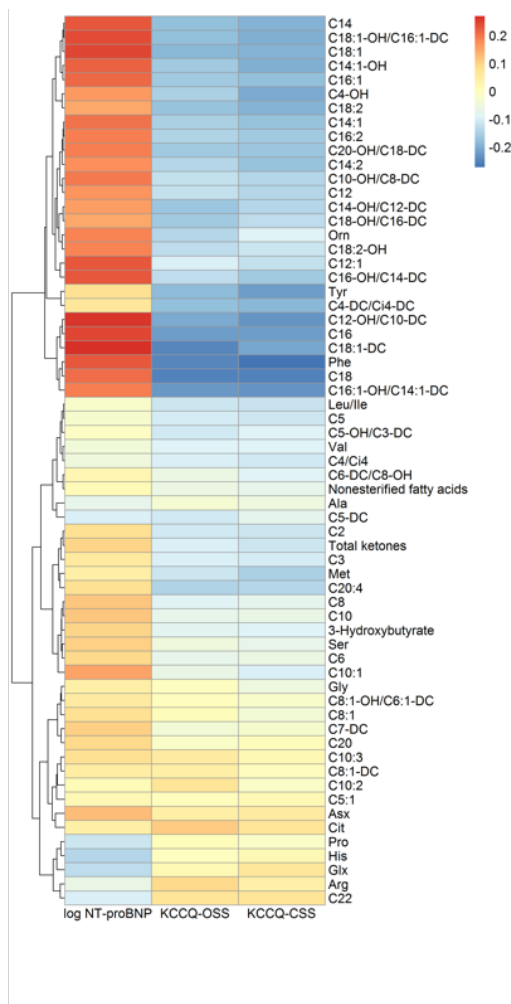

Supplement: NIHMS1828328-supplement-Supplemental_Publication_Material.pdf [file NIHMS1828328-supplement-Supplemental_Publication_Material.pdf]
